# Supplementary material for: Flexible and versatile anionic modules in the direction of 1-D, 2-D, and 3-D coordination frameworks by metal–ligand synergistic interactions
Source: Royal Society of Chemistry journal article supplement (doi:10.1039/b803736a), 2008-01-01
Supplement: b803736a.pdf [file b803736a.pdf]

*Electronic Supplementary Information (ESI) for B803736A*

**Flexible and versatile anionic modules in the direction of 1-D, 2-D, and 3-D  
coordination frameworks by metal-ligand synergistic interactions**

Zhi-Hui Zhang and Miao Du\*

*College of Chemistry and Life Science, Tianjin Normal University, Tianjin 300387, P. R. China*

*E-mail: dumiao@public.tpt.tj.cn. Tel.: 86-22-23540241. Fax: 86-22-23766556.*

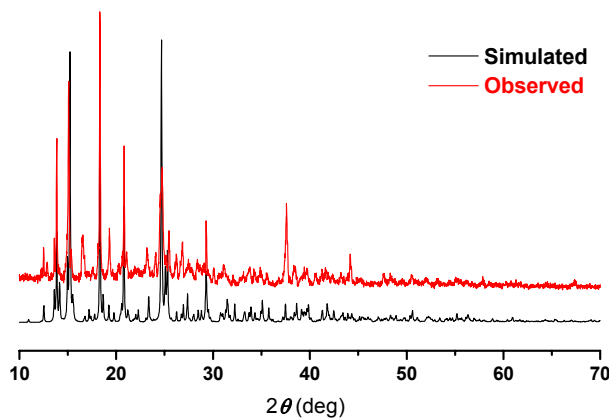

**(a)**

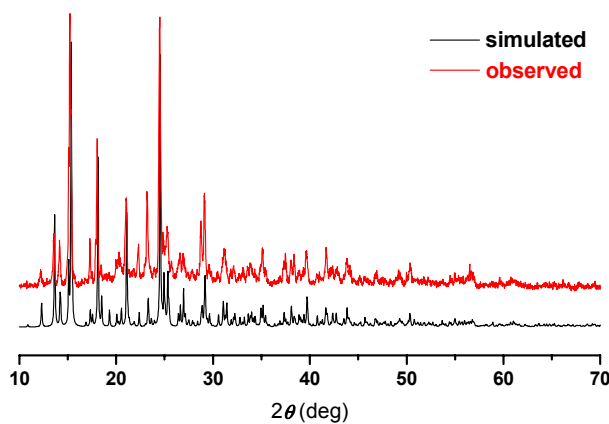

**(b)**

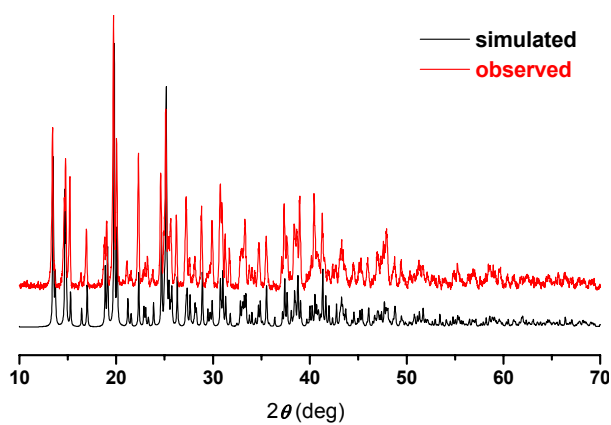

(c)

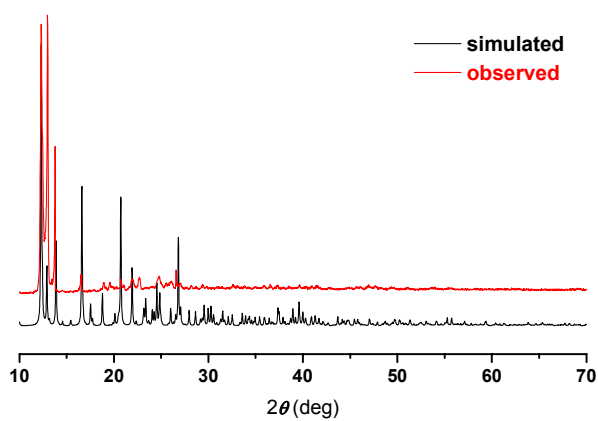

(d)

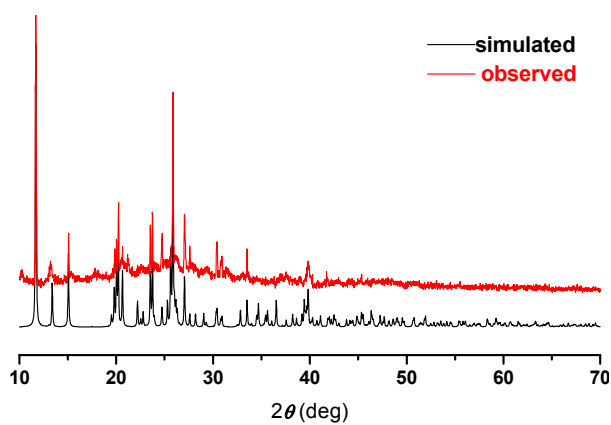

(e)

**Fig. S1** Simulated and observed XRPD patterns for complexes 1–5 (a–e).

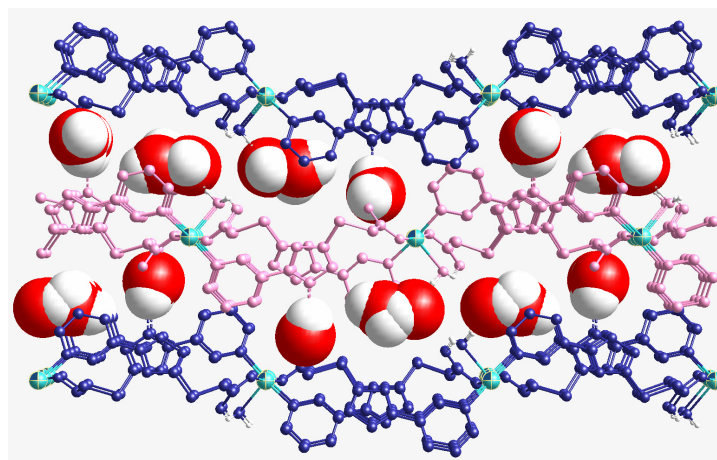

**Fig. S2** 3-D packing diagram of **4** viewing along [100], in which the lattice water molecules are shown in space-filling model.

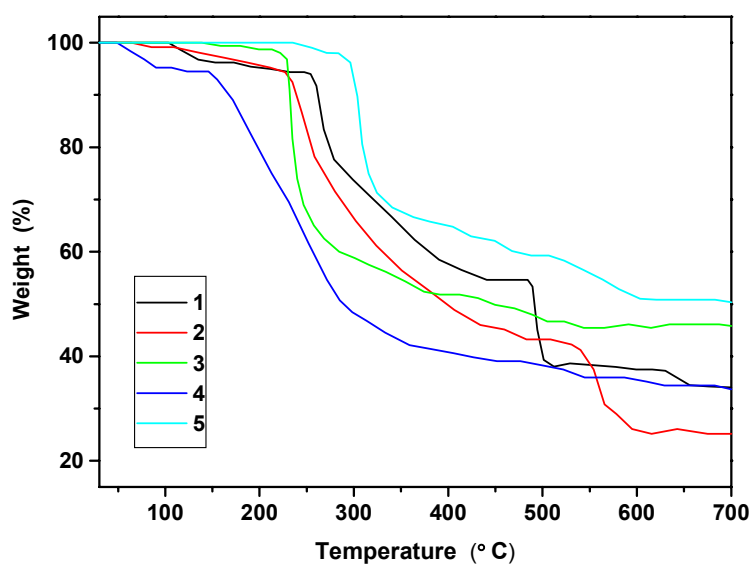

**Fig. S3** Thermogravimetric curves of complexes **1–5**.
